# Supplementary material for: A bird's-eye view of post-translational modifications in the spliceosome and their roles in spliceosome dynamics
Source: Royal Society of Chemistry journal article supplement (doi:10.1039/c002828b), 2010-07-29
Supplement: c002828b.pdf [file c002828b.pdf]

Table S1: Post-translational modifications of splicing factors

|                    |        |                  |                  |                       |                     |                                          |
|--------------------|--------|------------------|------------------|-----------------------|---------------------|------------------------------------------|
| Commitment Complex | SF1    | Hu               |                  |                       |                     | P <sup>42, 43, 101-104</sup>             |
|                    | BBP    | Mu               |                  |                       |                     | P <sup>105-110</sup>                     |
|                    |        | Sc               |                  |                       |                     | P <sup>35, 36</sup>                      |
|                    | Cbp80  | Hu               | Ac <sup>64</sup> |                       |                     | P <sup>43, 112</sup>                     |
|                    |        | Mu               |                  | Ub <sup>111</sup>     |                     | P <sup>109</sup>                         |
|                    |        | Sc               |                  |                       |                     |                                          |
| U1 snRNP           | Cbp20  | Hu               | Ac <sup>64</sup> |                       |                     | P <sup>44</sup>                          |
|                    |        | Mu               |                  |                       |                     | P <sup>105, 109</sup>                    |
|                    | UAP56  | Hu               | Ac <sup>64</sup> |                       | O-Glc <sup>73</sup> | P <sup>43</sup>                          |
|                    | Sub2   | Sc               |                  | Ub <sup>59, 111</sup> |                     | P <sup>35, 36, 45, 113</sup>             |
|                    | U2AF65 | Hu               | Ac <sup>64</sup> |                       |                     | P <sup>42, 43, 104, 114-117</sup>        |
|                    | Mud2   | Sc               |                  |                       |                     | P <sup>113</sup>                         |
|                    | U2AF35 | Hu               |                  |                       |                     | P <sup>42, 44</sup>                      |
|                    | U1 70k | Hu               | Ac <sup>64</sup> |                       |                     | P <sup>42, 43, 97, 102, 117-122</sup>    |
|                    |        | Mu               |                  |                       |                     | P <sup>113, 141, 154</sup>               |
|                    | FBP11  | Hu               | Ac <sup>64</sup> |                       |                     | P <sup>42, 43, 101, 114, 116</sup>       |
|                    | Prp40  | Mu               |                  |                       |                     | P <sup>106, 108-110</sup>                |
|                    |        | Sc               |                  |                       |                     | P <sup>35</sup>                          |
|                    |        | Sp               |                  |                       |                     | P <sup>123</sup>                         |
|                    | Usa1   | Sc               |                  | Ub <sup>111</sup>     |                     | P <sup>35, 45</sup>                      |
| U2 snRNP           | Prp39  | Hu               | Ac <sup>64</sup> |                       |                     | P <sup>125</sup>                         |
|                    |        | Sc               |                  | Ub <sup>156</sup>     |                     |                                          |
|                    | U1-A   | Hu               | Ac <sup>64</sup> |                       |                     | P <sup>43</sup>                          |
|                    | Snu71  | Sc               |                  |                       |                     | P <sup>35, 45</sup>                      |
|                    | Nam8   | Sc               |                  |                       |                     | P <sup>35</sup>                          |
|                    | U1-C   | Hu               | Ac <sup>64</sup> |                       |                     | P <sup>43, 126</sup>                     |
|                    | p68    | Hu               | Ac <sup>64</sup> |                       | O-Glc <sup>73</sup> | P <sup>43, 104, 117, 119, 122, 126</sup> |
|                    | U2AFM  | Hu               |                  |                       |                     | P <sup>42, 43</sup>                      |
|                    | DHX15  | Hu               | Ac <sup>64</sup> |                       | Su <sup>128</sup>   | P <sup>117</sup>                         |
|                    | Prp43  | Sc               |                  |                       |                     | P <sup>35, 36, 113, 129</sup>            |
| U2 snRNP           | SPF30  | Hu               | Ac <sup>64</sup> |                       |                     | P <sup>43, 102</sup>                     |
|                    | SPF31  | Hu               | Ac <sup>64</sup> |                       |                     | P <sup>104</sup>                         |
|                    | PUF60  | Hu               | Ac <sup>64</sup> |                       |                     | P <sup>43, 102</sup>                     |
|                    | SPF45  | Hu               | Ac <sup>64</sup> |                       |                     | P <sup>41-43, 104, 130, 131</sup>        |
|                    |        | Mu               |                  |                       |                     | P <sup>108, 110</sup>                    |
|                    | SNRPA1 | Hu               | Ac <sup>64</sup> |                       |                     | P <sup>43, 102</sup>                     |
|                    | Mu     |                  |                  |                       | P <sup>109</sup>    |                                          |
| SNRPB2             | Hu     | Ac <sup>64</sup> |                  |                       | P <sup>126</sup>    |                                          |

U2 snRNP (cont'd)

|                           |                |                  |                   |                      |                                                                                                             |
|---------------------------|----------------|------------------|-------------------|----------------------|-------------------------------------------------------------------------------------------------------------|
| SF3A1<br>Prp21            | Hu<br>Mu<br>Sc | Ac <sup>64</sup> |                   |                      | P <sup>42-44, 101, 104, 126, 130, 132</sup><br>P <sup>133</sup><br>P <sup>35</sup>                          |
| SF3A2<br>Prp11            | Hu<br>Sc       | Ac <sup>64</sup> |                   | Su <sup>128</sup>    | P <sup>35</sup>                                                                                             |
| SF3A3<br>Sap61            | Hu<br>Sp       | Ac <sup>64</sup> |                   | O-Glc <sup>134</sup> | P <sup>42, 43, 126</sup><br>P <sup>123</sup>                                                                |
| SAP155<br>Hsh155          | Hu<br>Mu<br>Sc | Ac <sup>64</sup> |                   |                      | P <sup>30, 42, 43, 101, 102, 114, 117, 119, 135, 136</sup><br>P <sup>105, 109, 110</sup><br>P <sup>35</sup> |
| SF3B2<br>Cus1             | Hu<br>Sc       | Ac <sup>64</sup> |                   |                      | P <sup>42-44, 101, 104, 116, 119, 131</sup><br>P <sup>125</sup>                                             |
| SF3B3<br>Sap130           | Hu<br>Sc       | Ac <sup>64</sup> | Ub <sup>111</sup> | O-Glc <sup>79</sup>  | P <sup>35</sup>                                                                                             |
| SF3B4                     | Hu             | Ac <sup>64</sup> |                   | Su <sup>128</sup>    | P <sup>122, 126</sup>                                                                                       |
| SF3B5                     | Hu             | Ac <sup>64</sup> |                   |                      | P <sup>44</sup>                                                                                             |
| SF3B14                    | Hu             | Ac <sup>64</sup> |                   |                      | P <sup>126</sup>                                                                                            |
| SF3B14b                   | Hu             | Ac <sup>64</sup> |                   |                      |                                                                                                             |
| SF3B125                   | Hu<br>Mu       | Ac <sup>64</sup> |                   |                      | P <sup>42, 43</sup><br>P <sup>106, 108-110, 137</sup>                                                       |
| Tat-Sf1<br>Cus2           | Hu<br>Sc       |                  |                   |                      | P <sup>41-44, 104, 116, 131, 138</sup><br>P <sup>45, 100, 139</sup>                                         |
| DDX46<br>Prp5             | Hu<br>Mu<br>Sc | Ac <sup>64</sup> |                   |                      | P <sup>42, 43, 101</sup><br>P <sup>108</sup><br>P <sup>139</sup>                                            |
| Sad1                      | Hu<br>Sc       | Ac <sup>64</sup> | Ub <sup>111</sup> |                      | P <sup>140</sup><br>P <sup>113</sup>                                                                        |
| SART1<br>Snu66            | Hu<br>Sc       |                  |                   | Su <sup>128</sup>    | P <sup>42-44, 101, 114, 130</sup><br>P <sup>35, 36, 45</sup>                                                |
| Prp4                      | Hu<br>Sc       | Ac <sup>64</sup> |                   |                      | P <sup>35</sup>                                                                                             |
| SART3<br>Prp24            | Hu<br>Sc       |                  |                   |                      | P <sup>42, 44</sup><br>P <sup>35, 36</sup>                                                                  |
| Prp3                      | Hu<br>Mu<br>Sc |                  |                   |                      | P <sup>41-44, 104, 131, 138</sup><br>P <sup>110, 133</sup><br>P <sup>35, 113</sup>                          |
| Nrb54                     | Hu             | Ac <sup>64</sup> |                   |                      | P <sup>42, 43, 102, 104, 114, 117, 119, 141</sup>                                                           |
| Prp38a<br>Prp38b<br>Prp38 | Hu<br>Hu<br>Sc | Ac <sup>64</sup> |                   |                      | P <sup>42, 43, 117, 119</sup><br>P <sup>42-44, 102, 117, 120, 121, 136</sup><br>P <sup>35</sup>             |
| Prp8                      | Hu<br>Mu<br>Sc | Ac <sup>64</sup> | Ub <sup>6</sup>   | Su <sup>128</sup>    | P <sup>43, 44, 114</sup><br>P <sup>44, 105</sup><br>P <sup>35</sup>                                         |
| Prp6                      | Hu<br>Sc       | Ac <sup>64</sup> |                   |                      | P <sup>43</sup><br>P <sup>139</sup>                                                                         |

U4/U6,U5 related

U5 snRNP

## U6 snRNP

## Nineteen Complex

## Step II Factors

|                   |                 |                         |                          |                            |                                                                                                            |
|-------------------|-----------------|-------------------------|--------------------------|----------------------------|------------------------------------------------------------------------------------------------------------|
| Prp1              | <i>Sp</i>       |                         |                          |                            | <b>P</b> <sup>123</sup>                                                                                    |
| Brr2              | Hu<br><i>Sc</i> | <b>Ac</b> <sup>64</sup> |                          | <b>Su</b> <sup>128</sup>   | <b>P</b> <sup>41-43, 101, 119, 130, 131, 138, 142</sup><br><b>P</b> <sup>35, 36</sup>                      |
| SNRP116<br>Snu114 | Hu<br><i>Sc</i> |                         | <b>Ub</b> <sup>111</sup> | <b>Su</b> <sup>128</sup>   | <b>P</b> <sup>42, 44, 101</sup><br><b>P</b> <sup>35, 45, 129</sup>                                         |
| Prp28             | Hu<br><i>Sc</i> |                         |                          |                            | <b>P</b> <sup>42</sup><br><b>P</b> <sup>35, 113</sup>                                                      |
| Prp2              | Hu<br><i>Sc</i> | <b>Ac</b> <sup>64</sup> |                          |                            | <b>P</b> <sup>42, 43, 104, 116, 126</sup><br><b>P</b> <sup>36</sup>                                        |
| KIAA0560          | Hu              | <b>Ac</b> <sup>64</sup> |                          |                            |                                                                                                            |
| Prp31             | Hu              |                         |                          |                            | <b>P</b> <sup>43</sup>                                                                                     |
| Lsm2              | Hu              |                         |                          |                            | <b>P</b> <sup>44, 126</sup>                                                                                |
| Lsm3              | <i>Sp</i>       |                         |                          |                            | <b>P</b> <sup>123</sup>                                                                                    |
| Lsm4              | <i>Sc</i>       |                         |                          |                            | <b>P</b> <sup>35</sup>                                                                                     |
| Lsm6              | Hu              | <b>Ac</b> <sup>64</sup> |                          |                            |                                                                                                            |
| Cwc15             | Hu<br><i>Sc</i> |                         |                          |                            | <b>P</b> <sup>42, 43, 119</sup><br><b>P</b> <sup>35</sup>                                                  |
| Ecm2              | Mu              |                         |                          |                            | <b>P</b> <sup>110</sup>                                                                                    |
| Syf1              | Hu              | <b>Ac</b> <sup>64</sup> |                          |                            | <b>P</b> <sup>43</sup>                                                                                     |
| Syf2              | <i>Sc</i>       |                         |                          |                            | <b>P</b> <sup>10, 35, 36</sup>                                                                             |
| Spp381            | <i>Sc</i>       |                         |                          |                            | <b>P</b> <sup>35</sup>                                                                                     |
| Isy1              | Hu<br><i>Sc</i> | <b>Ac</b> <sup>64</sup> |                          | <b>O-Glc</b> <sup>74</sup> | <b>P</b> <sup>44</sup>                                                                                     |
| Prp19             | Hu<br><i>Sc</i> | <b>Ac</b> <sup>64</sup> |                          | <b>O-Glc</b> <sup>74</sup> | <b>P</b> <sup>43</sup><br><b>P</b> <sup>35</sup>                                                           |
| Cwc2              | <i>Sc</i>       |                         |                          |                            | <b>P</b> <sup>125, 139</sup>                                                                               |
| SKIP<br>Prp46     | Hu<br><i>Sc</i> |                         |                          |                            | <b>P</b> <sup>43, 103, 104, 116, 120, 121, 136</sup><br><b>P</b> <sup>35</sup>                             |
| Ntc20             | <i>Sc</i>       |                         |                          |                            | <b>P</b> <sup>35</sup>                                                                                     |
| Ntr2              | <i>Sc</i>       |                         |                          |                            | <b>P</b> <sup>35</sup>                                                                                     |
| Prp16             | Hu              | <b>Ac</b> <sup>64</sup> |                          |                            | <b>P</b> <sup>43</sup>                                                                                     |
| Prp18             | Mu<br><i>Sc</i> |                         |                          |                            | <b>P</b> <sup>133</sup><br><b>P</b> <sup>125</sup>                                                         |
| CDC5              | Hu              | <b>Ac</b> <sup>64</sup> |                          |                            | <b>P</b> <sup>42, 43, 114</sup>                                                                            |
| DHX8<br>Prp22     | Hu<br><i>Sc</i> |                         |                          |                            | <b>P</b> <sup>43, 117, 143</sup><br><b>P</b> <sup>35, 129</sup>                                            |
| SRRM2<br>Cwc21    | Hu<br><i>Sp</i> | <b>Ac</b> <sup>64</sup> |                          |                            | <b>P</b> <sup>35, 41-44, 101, 102, 104, 114, 116, 117, 120, 121, 136, 138</sup><br><b>P</b> <sup>123</sup> |
| Cwc22             | Mu              |                         |                          |                            | <b>P</b> <sup>110</sup>                                                                                    |

Auxiliary Factors

|               |                |                  |  |                     |                                                                                                                         |
|---------------|----------------|------------------|--|---------------------|-------------------------------------------------------------------------------------------------------------------------|
|               | Sc             |                  |  |                     | P <sup>35, 36</sup>                                                                                                     |
| Cwc24         | Sc             |                  |  |                     | P <sup>35, 45, 113, 129</sup>                                                                                           |
| Cwc25         | Sp             |                  |  |                     | P <sup>123</sup>                                                                                                        |
| Slu7          | Hu<br>Sc       |                  |  | O-Glc <sup>75</sup> | P <sup>41, 42, 102, 117, 130</sup><br>P <sup>35, 36, 45</sup>                                                           |
| Spp2          | Sc<br>Sp       |                  |  |                     | P <sup>35</sup><br>P <sup>123</sup>                                                                                     |
| PRP17         | Hu<br>Mu       |                  |  |                     | P <sup>42</sup><br>P <sup>107</sup>                                                                                     |
| Lsm1          | Sc             |                  |  |                     | P <sup>139</sup>                                                                                                        |
| DBR1<br>Prp26 | Hu<br>Mu<br>Sc | Ac <sup>64</sup> |  |                     | P <sup>42, 43, 121</sup><br>P <sup>108</sup><br>P <sup>45</sup>                                                         |
| Smd2          | Sc             |                  |  |                     | P <sup>125</sup>                                                                                                        |
| Npl3<br>Srp2  | Sc<br>Sp       |                  |  | O-Glc <sup>75</sup> | P <sup>35, 36, 45, 129, 144</sup><br>P <sup>123</sup>                                                                   |
| Spp41         | Sc             |                  |  | Su <sup>145</sup>   | P <sup>35, 36, 45</sup>                                                                                                 |
| WBP11         | Hu<br>Mu       | Ac <sup>64</sup> |  |                     | P <sup>42, 43, 121</sup><br>P <sup>105, 109, 133</sup>                                                                  |
| Urn1          | Sc             |                  |  |                     | P <sup>35</sup>                                                                                                         |
| Aar2          | Sc<br>Sp       |                  |  |                     | P <sup>35</sup><br>P <sup>123</sup>                                                                                     |
| KHSRP         | Hu<br>Mu       | Ac <sup>64</sup> |  | O-Glc <sup>73</sup> | P <sup>43, 44, 104, 119-121</sup><br>P <sup>35, 44, 146</sup>                                                           |
| TRA2B         | Hu<br>Mu       |                  |  |                     | P <sup>42-43, 106-107, 124, 127</sup><br>P <sup>112, 114-115, 152-153</sup>                                             |
| TDP43         | Hu             |                  |  | O-Glc <sup>73</sup> | P <sup>42</sup>                                                                                                         |
| KIAA1966      | Hu             |                  |  |                     | P <sup>41-43, 101, 102, 117, 119, 120, 136, 138</sup>                                                                   |
| ZRAB2         | Hu<br>Mu       |                  |  |                     | P <sup>41-44, 101, 104, 114, 116, 120, 121, 130, 131</sup><br>P <sup>109, 110, 147</sup>                                |
| MAGOHB        | Hu             | Ac <sup>64</sup> |  |                     | P <sup>120, 121</sup>                                                                                                   |
| GEMIN5        | Hu<br>Mu       | Ac <sup>64</sup> |  | Su <sup>128</sup>   | P <sup>42, 101, 102, 119</sup><br>P <sup>109</sup>                                                                      |
| PTB           | Hu             |                  |  | Su <sup>128</sup>   | P <sup>43, 121, 124, 127</sup>                                                                                          |
| hnRNP A1      | Hu<br>Mu       | Ac <sup>64</sup> |  |                     | P <sup>42, 43, 104, 114, 116, 117, 119, 120, 122, 126, 148, 152</sup><br>P <sup>105, 107, 109, 110, 149, 150, 154</sup> |
| hnRNP A3      | Hu             | Ac <sup>64</sup> |  |                     | P <sup>43, 104, 114, 116, 119-121</sup>                                                                                 |
| hnRNP C       | Hu<br>Mu       | Ac <sup>64</sup> |  | Su <sup>128</sup>   | P <sup>42, 43, 103, 104, 119, 130, 131, 141, 151, 155</sup><br>P <sup>35, 105, 108-110</sup>                            |
| hnRNP D       | Hu<br>Mu       | Ac <sup>64</sup> |  |                     | P <sup>42, 43, 101, 104, 119, 130, 131, 143</sup><br>P <sup>110</sup>                                                   |

|          |          |                  |  |                   |                                                                                    |
|----------|----------|------------------|--|-------------------|------------------------------------------------------------------------------------|
| hnRNP F  | Hu       | Ac <sup>64</sup> |  |                   | P <sup>42-44, 101, 119, 126</sup>                                                  |
| hnRNP H1 | Hu<br>Mu |                  |  |                   | P <sup>42, 43, 101, 116, 117, 119, 126</sup><br>P <sup>105, 107</sup>              |
| hnRNP L  | Hu       | Ac <sup>64</sup> |  | Su <sup>128</sup> | P <sup>43</sup>                                                                    |
| hnRNP M  | Hu<br>Mu | Ac <sup>64</sup> |  | Su <sup>128</sup> | P <sup>41, 42, 102, 119, 144</sup><br>P <sup>105, 137</sup>                        |
| hnRNP U  | Hu       | Ac <sup>64</sup> |  |                   | P <sup>42, 43, 103, 104, 114, 117, 119</sup>                                       |
| RBM22    | Hu       | Ac <sup>64</sup> |  |                   |                                                                                    |
| Raly     | Hu<br>Mu | Ac <sup>64</sup> |  |                   | P <sup>41-44, 103, 117, 119, 130, 151, 155</sup><br>P <sup>107-110, 150, 154</sup> |
